# Supplementary material for: Temporal dynamics of SARS-CoV-2 mutation accumulation within and across infected hosts
Source: PubMed Central journal article supplement — bioRxiv. 2021 Jan 20:2021.01.19.427330. Preprint. [Version 1] doi: 10.1101/2021.01.19.427330 (PMC7836113; doi:10.1101/2021.01.19.427330), 2021-01-20
Supplement: media-1.pdf [file media-1.pdf]

## Supplemental Figure 1

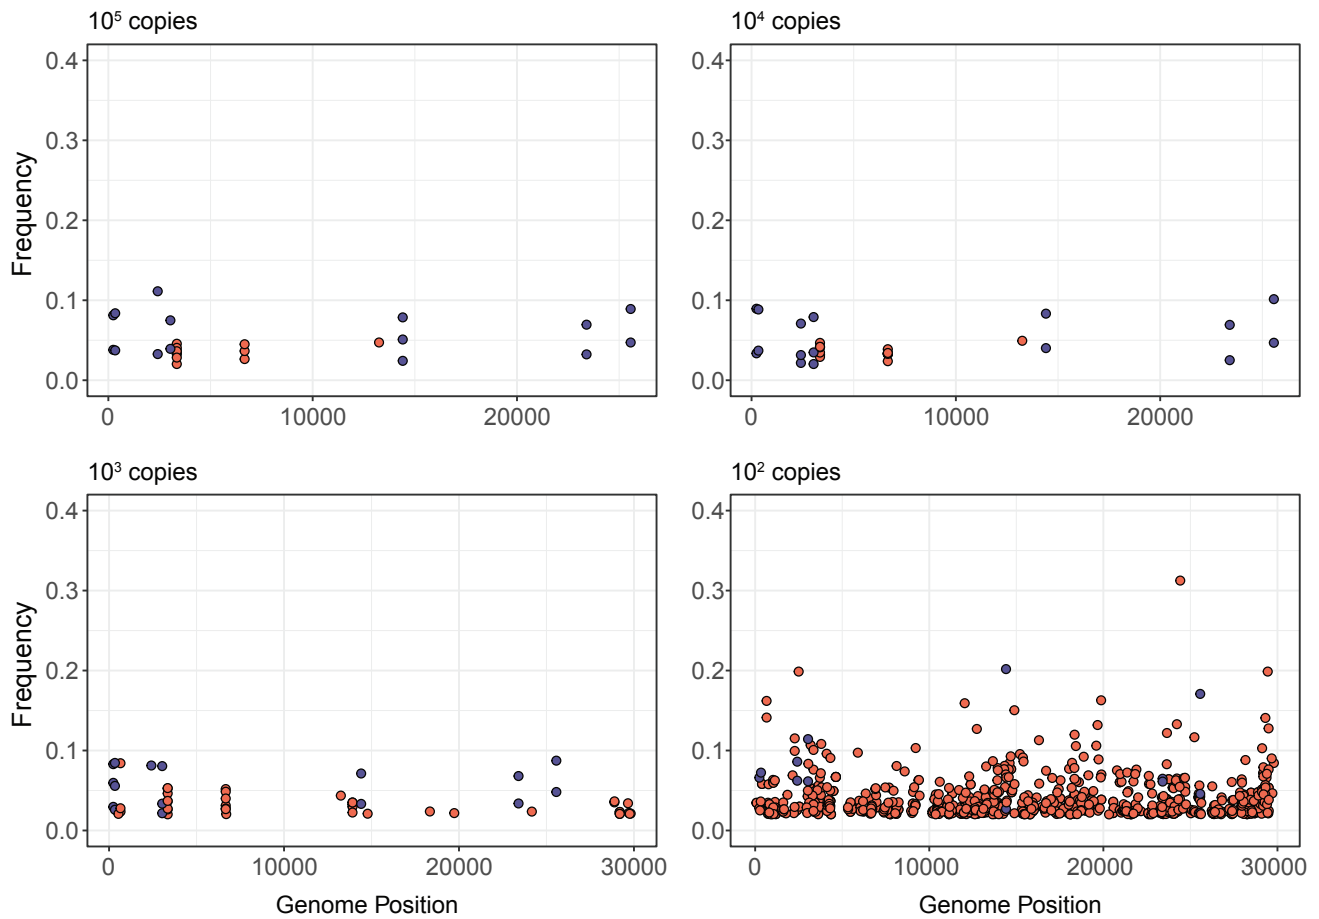

Supplemental Figure 1. True and false positive iSNV in RNA mixture validation experiment. Each iSNV is shown as a point, with the frequency on the y-axis and genome position on the x-axis. True positive iSNV are shown in violet and false positive iSNV are shown in orange. All iSNV displayed have a frequency of 2% or greater. Viral loads are shown above each facet, in units of genome copies per microliter of RNA.
