# Supplementary material for: Temporal dynamics of SARS-CoV-2 mutation accumulation within and across infected hosts
Source: PubMed Central journal article supplement — bioRxiv. 2021 Jan 20:2021.01.19.427330. Preprint. [Version 1] doi: 10.1101/2021.01.19.427330 (PMC7836113; doi:10.1101/2021.01.19.427330), 2021-01-20
Supplement: media-3.pdf [file media-3.pdf]

### Supplemental Figure 3

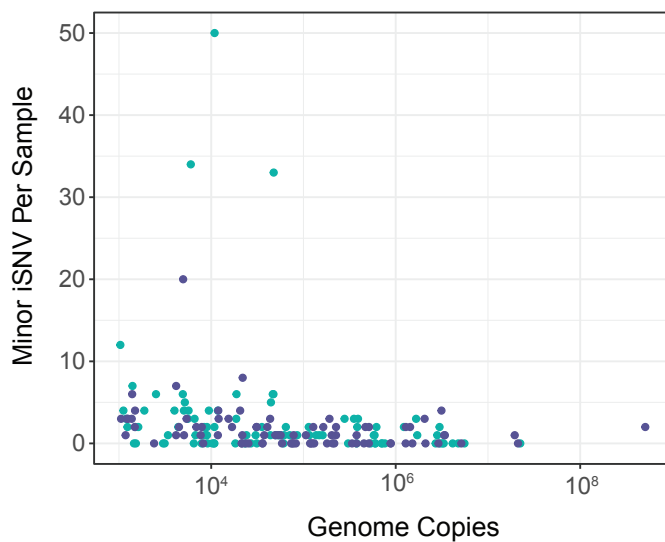

Supplemental Figure 3. Number of minor iSNV per sample (y-axis) by genome copies per microliter of RNA (x-axis). Hospitalized patients are shown by teal points and employees shown by violet points.
