# Supplementary material for: Temporal dynamics of SARS-CoV-2 mutation accumulation within and across infected hosts
Source: PubMed Central journal article supplement — bioRxiv. 2021 Jan 20:2021.01.19.427330. Preprint. [Version 1] doi: 10.1101/2021.01.19.427330 (PMC7836113; doi:10.1101/2021.01.19.427330), 2021-01-20
Supplement: media-4.pdf [file media-4.pdf]

## Supplemental Figure 4

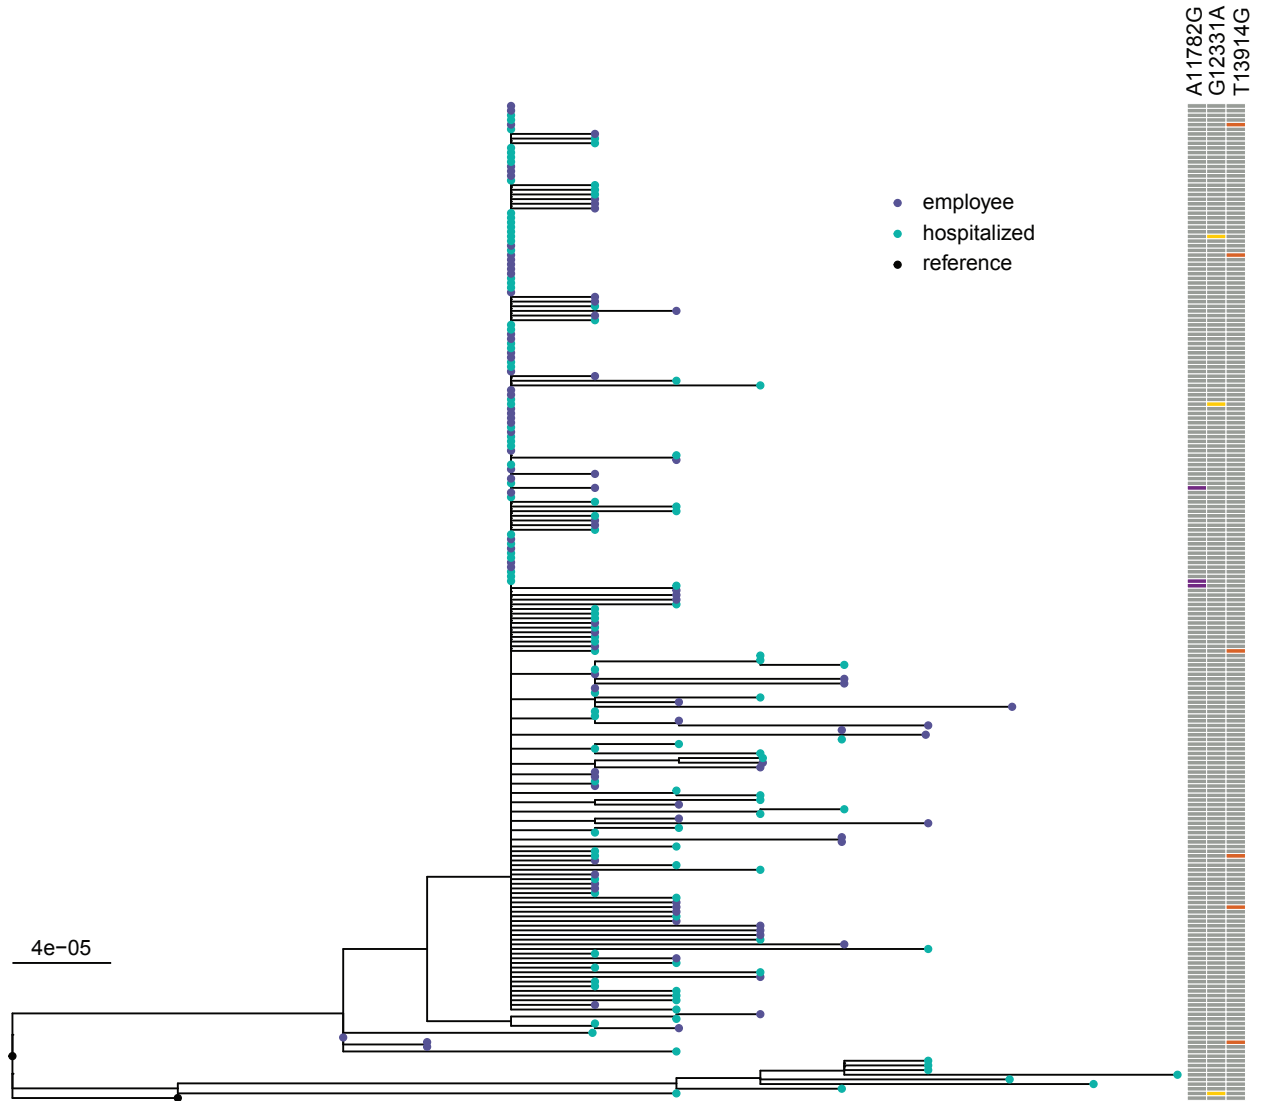

Supplemental Figure 4. Maximum likelihood phylogenetic tree as shown in Figure 1C. Tips represent complete consensus genomes from hospitalized patients (teal) and employees (violet). The x-axis shows divergence from the root (Wuhan-Hu-1/2019). Heatmaps show samples that contain each of the three mutations as an iSNV.
